# Supplementary material for: Dataset on waste management behaviors of urban citizens in large cities of Indonesia
Source: PubMed Central journal article supplement (PMC7394850; doi:10.1016/j.dib.2020.106053), 2020-07-22
Supplement: mmc3.pdf [file mmc3.pdf]

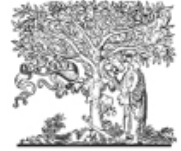

**ELSEVIER**

**Language Editing Services**

*Registered Office:*  
Elsevier Ltd  
The Boulevard, Langford Lane,  
Kidlington, OX5 1GB, UK.  
Registration No. 331566771

### **To whom it may concern**

The paper "Dataset on Waste Management Behaviors of Urban Citizens of Big Cities in Indonesia" by Agus Brotosusilo was edited by Elsevier Language Editing Services.

Kind regards,

**Elsevier Webshop Support**
